# Supplementary material for: QTL Validation and Development of SNP-Based High Throughput Molecular Markers Targeting a Genomic Region Conferring Narrow Root Cone Angle in Aerobic Rice Production Systems
Source: MDPI journal article supplement (doi:10.3390/plants10102099), 2021-10-03
Supplement: s1 [file s1]

Table S1. Chi-square analysis of the observed and expected Mendelian segregation ratio for unfavourable (AA), favourable (BB), and heterozygote (AB) alleles in the F<sub>2</sub> populations (POP).

| <b>SNP ID</b> | <b>POP</b> | <b>AA</b> | <b>AB</b> | <b>BB</b> | <b>Chi-Square</b> | <b>P Value</b> |
|---------------|------------|-----------|-----------|-----------|-------------------|----------------|
| snpOS00933    | IRLA       | 50        | 101       | 42        | 1.08              | 0.582          |
| snpOS00934    | IRLA       | 49        | 103       | 43        | 0.99              | 0.610          |
| snpOS00935    | IRLA       | 49        | 104       | 41        | 1.67              | 0.434          |
| snpOS00938    | IRLA       | 44        | 109       | 43        | 2.48              | 0.289          |
| snpOS00940    | IRLA       | 44        | 107       | 45        | 1.66              | 0.435          |
| snpOS00941    | IRLA       | 44        | 107       | 45        | 1.66              | 0.435          |
| snpOS00944    | IRLA       | 44        | 106       | 46        | 1.35              | 0.510          |
| snpOS00945    | IRLA       | 47        | 111       | 33        | 7.08              | 0.029*         |
| snpOS00947    | IRLA       | 46        | 118       | 25        | 16.35             | 0.000*         |
| snpOS00948    | IRLA       | 54        | 91        | 48        | 1.00              | 0.607          |
| snpOS00933    | IRNO       | 65        | 134       | 82        | 2.66              | 0.265          |
| snpOS00935    | IRNO       | 66        | 137       | 80        | 1.67              | 0.434          |
| snpOS00940    | IRNO       | 65        | 138       | 79        | 1.52              | 0.468          |
| snpOS00944    | IRNO       | 66        | 141       | 75        | 0.57              | 0.750          |
| snpOS00945    | IRNO       | 70        | 151       | 58        | 2.93              | 0.231          |
| snpOS00947    | IRNO       | 70        | 179       | 26        | 39.13             | 0.000*         |
| snpOS00948    | IRNO       | 61        | 146       | 76        | 1.88              | 0.391          |
| snpOS00933    | IRRL       | 87        | 171       | 67        | 3.35              | 0.187          |
| snpOS00934    | IRRL       | 89        | 166       | 69        | 2.67              | 0.264          |
| snpOS00935    | IRRL       | 89        | 168       | 71        | 2.17              | 0.338          |
| snpOS00938    | IRRL       | 92        | 168       | 65        | 4.86              | 0.088          |
| snpOS00940    | IRRL       | 91        | 170       | 67        | 3.95              | 0.139          |
| snpOS00941    | IRRL       | 91        | 168       | 67        | 3.84              | 0.147          |
| snpOS00944    | IRRL       | 89        | 170       | 69        | 2.88              | 0.237          |
| snpOS00947    | IRRL       | 74        | 169       | 65        | 3.45              | 0.178          |
| snpOS00948    | IRRL       | 77        | 155       | 82        | 0.21              | 0.900          |

\*:  $P < 0.05$

Table S2. Potential donors of *qRCA4* locus identified using SNP genotype data publicly available through the 3K Rice Genotyping Project (3KRGP).

| Genotype/Variety              | 3KRGP IRIS ID  | Country of Origin | Chr04:30302635 | Chr04:30461857 | Subpopulation        |
|-------------------------------|----------------|-------------------|----------------|----------------|----------------------|
| Y134                          | CX15           | -                 | A              | T              | Indica               |
| IAS 22-8 PALMAR::IRGC 26058-1 | IRIS 313-10967 | Brazil            | A              | T              | Temperate japonica   |
| CX578                         | CX578          | -                 | A              | T              | Temperate japonica   |
| LEUANG GLIANG::IRGC 71271-1   | IRIS 313-9123  | Thailand          | A              | T              | Subtropical japonica |
| NAM ROO::IRGC 66996-1         | IRIS 313-10176 | Thailand          | A              | T              | Subtropical japonica |
| CHA LOY OE::C1                | IRIS 313-7856  | -                 | A              | T              | Subtropical japonica |
| KAO SONG HAI::IRGC 61827-1    | IRIS 313-11623 | China             | A              | T              | Subtropical japonica |
| SI NAM PUENG::IRGC 75165-1    | IRIS 313-11926 | Thailand          | A              | T              | Subtropical japonica |
| XIENG KANG::IRGC 82533-1      | IRIS 313-12063 | Lao PDR           | A              | T              | Subtropical japonica |
| THATENG::IRGC 86377-1         | IRIS 313-12134 | Lao PDR           | A              | T              | Subtropical japonica |
| SET::IRGC 92200-1             | IRIS 313-12227 | Lao PDR           | A              | T              | Subtropical japonica |
| A MOUK::IRGC 94474-1          | IRIS 313-12252 | Lao PDR           | A              | T              | Subtropical japonica |
| BAN BONG::IRGC 94565-1        | IRIS 313-12254 | Lao PDR           | A              | T              | Subtropical japonica |
| NYAE::IRGC 95302-1            | IRIS 313-12262 | Lao PDR           | A              | T              | Subtropical japonica |
| TA SENG::IRGC 99176-1         | IRIS 313-12312 | Lao PDR           | A              | T              | Subtropical japonica |
| BAN KEO::IRGC 99953-1         | IRIS 313-12323 | Lao PDR           | A              | T              | Subtropical japonica |
| DENG NYAY::IRGC 106907-1      | IRIS 313-12332 | Lao PDR           | A              | T              | Subtropical japonica |
| HAI NA::IRGC 107117-1         | IRIS 313-12342 | Lao PDR           | A              | T              | Subtropical japonica |
| LAB::IRGC 107468-1            | IRIS 313-12346 | Lao PDR           | A              | T              | Subtropical japonica |
| KHAI DO::IRGC 12903-2         | IRIS 313-10679 | Lao PDR           | A              | T              | Subtropical japonica |
| KHAO TAM::IRGC 30085-2        | IRIS 313-11093 | Lao PDR           | A              | T              | Subtropical japonica |
